# Supplementary material for: Reporting quality of studies using machine learning models for medical diagnosis: a systematic review
Source: PubMed Central journal article supplement — BMJ Open. 2020 Mar 23;10(3):e034568. doi: 10.1136/bmjopen-2019-034568 (PMC7103817; doi:10.1136/bmjopen-2019-034568), 2020-03-23
Supplement: bmjopen-2019-034568supp001.pdf [file bmjopen-2019-034568supp001.pdf]

## Search strategy using Medline (restricted to Core Clinical Journals)

- 1) machine learning,
- 2) supervised learning
- 3) unsupervised learning
- 4) deep learning
- 5) artificial Intelligence
- 6) decision trees
- 7) Artificial
- 8) Neural Network
- 9) CNN
- 10) ANN
- 11) Convolutional Neural Network
- 12) random forest,
- 13) reinforcement learning
- 14) gradient boosting
- 15) computer aided diagnosis
- 16) CAD
- 17) computer assisted diagnosis
- 18) computational analysis
  
- 19) OR/ 1-18
  
- 20) Diagnosis
  
- 21) 19 AND 20

## List of eligible studies

| Author                     | Journal                                    | Specialty        | Title                                                                                                                                                                                                            |
|----------------------------|--------------------------------------------|------------------|------------------------------------------------------------------------------------------------------------------------------------------------------------------------------------------------------------------|
| Asaoka et al., 2017        | American journal of ophthalmology          | Ophthalmology    | Validating the usefulness of the “random forests” classifier to diagnose early glaucoma with optical coherence tomography.                                                                                       |
| Bahl et al., 2017          | Radiology                                  | Oncology         | High-risk breast lesions: a machine learning model to predict pathologic upgrade and reduce unnecessary surgical excision.                                                                                       |
| Becker et al., 2018        | The British journal of radiology           | Oncology         | Classification of breast cancer in ultrasound imaging using a generic deep learning analysis software: a pilot study.                                                                                            |
| Bejnordi et al., 2017      | JAMA                                       | Oncology         | Diagnostic assessment of deep learning algorithms for detection of lymph node metastases in women with breast cancer.                                                                                            |
| Chen et al., 2018          | Gastroenterology                           | Gastroenterology | Accurate classification of diminutive colorectal polyps using computer-aided analysis.                                                                                                                           |
| Demertzi et al., 2015      | Brain                                      | Neurology        | Intrinsic functional connectivity differentiates minimally conscious from unresponsive patients.                                                                                                                 |
| Dinh et al., 2018          | Radiology                                  | Oncology         | Characterization of prostate cancer with Gleason score of at least 7 by using quantitative multiparametric MR imaging: validation of a computer-aided diagnosis system in patients referred for prostate biopsy. |
| Eshagi et al., 2016        | Neurology                                  | Neurology        | Gray matter MRI differentiates neuromyelitis optica from multiple sclerosis using random forest.                                                                                                                 |
| Gallego-Ortiz et al., 2015 | Radiology                                  | Oncology         | Improving the accuracy of computer-aided diagnosis for breast MR imaging by differentiating between mass and nonmass lesions.                                                                                    |
| Hao et al., 2016           | The Journal of pediatrics                  | Immunology       | A classification tool for differentiation of Kawasaki disease from other febrile illnesses.                                                                                                                      |
| Harper et al., 2016        | Brain                                      | Neurology        | MRI visual rating scales in the diagnosis of dementia: evaluation in 184 post-mortem confirmed cases.                                                                                                            |
| Hornbrook et al., 2017     | Digestive diseases and sciences            | Oncology         | Early colorectal cancer detected by machine learning model using gender, age, and complete blood count data.                                                                                                     |
| Huang et al., 2017         | Radiology                                  | Oncology         | Added value of computer-aided CT image features for early lung cancer diagnosis with small pulmonary nodules: a matched case-control study.                                                                      |
| Keller et al., 2016        | Journal of Allergy and Clinical Immunology | Immunology       | Mutation in IRF2BP2 is responsible for a familial form of common variable immunodeficiency disorder.                                                                                                             |
| Lee et al., 2015           | American Journal of Roentgenology          | Oncology         | Does computer-aided diagnosis permit differentiation of angiomyolipoma without visible fat from renal cell carcinoma on MDCT?                                                                                    |
| Li et al., 2017            | American Journal of Roentgenology          | Oncology         | Computer-aided diagnosis of ground-glass opacity nodules using open-source software for quantifying tumor heterogeneity.                                                                                         |

|                        |                                        |                     |                                                                                                                                                                         |
|------------------------|----------------------------------------|---------------------|-------------------------------------------------------------------------------------------------------------------------------------------------------------------------|
| Lu et al., 2016        | Medicine                               | Psychiatry          | Discriminative analysis of schizophrenia using support vector machine and recursive feature elimination on structural MRI images.                                       |
| Moller et al., 2015    | Radiology                              | Neurology           | Alzheimer disease and behavioral variant frontotemporal dementia: automatic classification based on cortical atrophy for single-subject diagnosis.                      |
| Narula et al., 2016    | Cardiology                             | Cardiology          | Machine-learning algorithms to automate morphological and functional assessments in 2D echocardiography.                                                                |
| Ng et al., 2015        | American journal of clinical pathology | Oncology            | Computer-aided detection of rare tumor populations in flow cytometry: An example with classic Hodgkin lymphoma.                                                         |
| Silterra et al., 2016  | The Journal of infectious diseases     | Infectious diseases | Transcriptional categorization of the etiology of pneumonia syndrome in pediatric patients in malaria-endemic areas.                                                    |
| Somnay et al., 2017    | Surgery                                | Endocrinology       | Improving diagnostic recognition of primary hyperparathyroidism with machine learning                                                                                   |
| Sun et al., 2017       | Radiology                              | Neurology           | Psychoradiologic utility of MR imaging for diagnosis of attention deficit hyperactivity disorder: a radiomics analysis                                                  |
| Ta et al., 2017        | Radiology                              | Hepatology          | Focal Liver Lesions: Computer-aided Diagnosis by Using Contrast-enhanced US Cine Recording.                                                                             |
| Ting et al., 2017      | JAMA                                   | Ophthalmology       | Development and validation of a deep learning system for diabetic retinopathy and related eye diseases using retinal images from multiethnic populations with diabetes. |
| Tomlinson et al., 2016 | Chest                                  | Oncology            | Transcriptional profiling of endobronchial ultrasound-guided lymph node samples aids diagnosis of mediastinal lymphadenopathy.                                          |
| Yasaka et al., 2017a   | Radiology                              | Oncology            | Deep learning with convolutional neural network for differentiation of liver masses at dynamic contrast-enhanced CT: a preliminary study.                               |
| Yasaka et al., 2017b   | Radiology                              | Oncology            | Liver fibrosis: deep convolutional neural network for staging by using gadoteric acid-enhanced hepatobiliary phase MR images.                                           |
